# Supplementary material
Source: PubMed Central journal article supplement (PMC6958107)
Supplement: ijcep0011-1383-f5.pdf [file ijcep0011-1383-f5.pdf]

## Aberrant circulating miRNAs in osteoporosis patients

**Supplementary Table 1.** Primers for reverse transcription and real-time PCR of miRNA

| miRNA      | Reverse transcript PCR primer                       | Forward             | Reverse          |
|------------|-----------------------------------------------------|---------------------|------------------|
| miR-10b-5p | GTCGTATCCAGTGCAGGGTCCGAGGTATTTCGCACTGGATACGACCACAAA | TACCCTGTAGAACCGAATT | GTGCAGGGTCCGAGGT |
| miR-328-3p | GTCGTATCCAGTGCAGGGTCCGAGGTATTTCGCACTGGATACGACACGGAA | CTGGCCCTCTCTGCCCTT  | GTGCAGGGTCCGAGGT |
| miR-100    | GTCGTATCCAGTGCAGGGTCCGAGGTATTTCGCACTGGATACGACCACAAG | AACCCGTAGATCCGAACT  | GTGCAGGGTCCGAGGT |
| let-7g-5p  | GTCGTATCCAGTGCAGGGTCCGAGGTATTTCGCACTGGATACGACAACGT  | TGAGGTAGTAGTTTGTAC  | GTGCAGGGTCCGAGG  |

## Aberrant circulating miRNAs in osteoporosis patients

**Supplementary Table 2.** Summary of selected miRNAs targets for KEGG and GO analysis

| let-7-5p | miR-133a | miR-328  | miR-22   | miR-2861       | miR-518d     | miR-10b-5p | miR-21   | miR-125  | miR-23-3p | miR-100     | miR-2861       | miR-518d     | miR-125  |
|----------|----------|----------|----------|----------------|--------------|------------|----------|----------|-----------|-------------|----------------|--------------|----------|
| HMGA2    | LHFP     | DRGX     | C17orf58 | AL627309.1     | GIPC3        | BDNF       | ZNF367   | FAM169B  | ZNF225    | EPDR1       | AL627309.1     | GIPC3        | FAM169B  |
| ARID3B   | SEC61B   | EIF4EBP1 | CCDC67   | ZNF488         | APTX         | ARSJ       | KRIT1    | DRAM2    | ZNF267    | AP1AR       | ZNF488         | APTX         | DRAM2    |
| LIN28B   | TAGLN2   | PGM2     | KIAA0040 | SPTBN5         | IPO7         | CRLF3      | IL12A    | GCNT1    | PNRC2     | ST6GAL-NAC4 | SPTBN5         | IPO7         | GCNT1    |
| FIGN     | CETN3    | FOXS1    | GRM5     | C22orf46       | PTGES3L      | TFAP2C     | FASLG    | RFXANK   | TFRC      | TTC39A      | C22orf46       | PTGES3L      | RFXANK   |
| TRIM71   | FTL      | CTNNBIP1 | H3F3C    | MRM1           | SLC25A33     | HOXA3      | FGF18    | TRIM71   | AUH       | HS3ST2      | MRM1           | SLC25A33     | TRIM71   |
| NR6A1    | LDLRAP1  | CHP2     | NAA20    | FAM83A         | IGFL4        | VWC2L      | CCL1     | NLRC5    | ZNF286B   | BAZ2A       | FAM83A         | IGFL4        | NLRC5    |
| THRSP    | PTBP1    | DUSP16   | ZDHHC16  | BZRAP1         | CRYBA1       | SLC6A19    | GPR64    | BAK1     | KIAA1467  | KBTBD8      | BZRAP1         | CRYBA1       | BAK1     |
| USP44    | CLTA     | CHST7    | BATF3    | HSPG2          | TFRC         | RNF186     | AIM1L    | SWSAP1   | PIIF      | FKBP5       | HSPG2          | TFRC         | SWSAP1   |
| FAM222B  | TFAP2D   | KLHL42   | EIF4EBP3 | SPATA33        | CIB4         | SOBP       | PLEKHA1  | NPL      | PKP4      | HES7        | SPATA33        | CIB4         | NPL      |
| IGDCC3   | CELF4    | EDARADD  | DDIT4    | XIRP1          | CD33         | TFRC       | RSAD2    | C19orf54 | ZNF667    | HS3ST3B1    | XIRP1          | CD33         | C19orf54 |
| IGF2BP1  | SLC50A1  | LYVE1    | FUT9     | FAM222B        | BATF3        | SMAP1      | SCML2    | BIN2     | ZNF420    | FGFR3       | FAM222B        | BATF3        | BIN2     |
| VSTM5    | SYT2     | FUBP1    | PDSS1    | APOC2          | DHPS         | KPNA5      | YOD1     | TSNARE1  | MICU3     | CTDSPL      | APOC2          | DHPS         | TSNARE1  |
| FZD3     | TMEM200B | UBFD1    | LIN7C    | CHTF8          | CLK4         | GATA6      | PELL1    | RAB3D    | ZNF287    | RAVER2      | CHTF8          | CLK4         | RAB3D    |
| PXT1     | TIMM17A  | NF2      | H3F3B    | DRAXIN         | IGFBP1       | HCN1       | TGFB1    | ARID3B   | SNRPC     | SMARCA5     | DRAXIN         | IGFBP1       | ARID3B   |
| DTX2     | BICC1    | SNX21    | NET1     | TPRXL          | ECHDC1       | FIGN       | ARMCX1   | STARD13  | STARD3NL  | LRRC8B      | TPRXL          | ECHDC1       | STARD13  |
| YOD1     | RBMX     | NXPH3    | OGN      | ZNF512B        | APOA2        | DAZAP1     | MATN2    | C19orf38 | PDE4B     | HOXA1       | ZNF512B        | APOA2        | C19orf38 |
| PTAFR    | VKORC1   | DYNC1I1  | CYTH3    | LCN2           | PBDC1        | HOXB3      | SKP2     | ACHE     | MRC1L1    | GMPS        | LCN2           | PBDC1        | ACHE     |
| NGF      | ZNF354A  | TMEM229A | SYNE1    | ANKRD23        | KCTD14       | NR6A1      | NTF3     | SLC25A35 | PDE7A     | MTOR        | ANKRD23        | KCTD14       | SLC25A35 |
| SLC52A3  | SAMD5    | TCF7L2   | IKZF4    | CEACAM19       | CCDC179      | KLHL29     | TIMP3    | SERTAD3  | MRC1      | NR6A1       | CEACAM19       | CCDC179      | SERTAD3  |
| XKR8     | PRRT2    | TESK2    | ESR1     | FAM83F         | GNA14        | NCOR2      | BEST3    | SSTR3    | TOP1      | FZD8        | FAM83F         | GNA14        | SSTR3    |
| BZW1     | LASP1    | NR3C1    | RGS2     | FIBCD1         | RSL24D1      | ERGIC2     | SMAD7    | ZFP62    | RALYL     | NTRK3       | FIBCD1         | RSL24D1      | ZFP62    |
| ARHGEF38 | ZIC3     | CHTF8    | ASB6     | PPIB           | MSH5         | ELOVL2     | MSH2     | KLF13    | SNX5      | TMEM30A     | PPIB           | MSH5         | KLF13    |
| FAM103A1 | PPP2CA   | RGL2     | IL31     | ARHGDI1        | BCAP29       | USP46      | RNFT1    | RIN3     | MYH4      | RASGRP3     | ARHGDI1        | BCAP29       | RIN3     |
| MDM4     | PAX7     | PIGA     | ACER3    | CTB-5409.9     | ARL2BP       | RPRD1A     | SATB1    | KCNIP3   | PROK2     | CLDN11      | CTB-5409.9     | ARL2BP       | KCNIP3   |
| BACH1    | C12orf43 | NPFRR1   | ELOVL6   | PLA2G2C        | URGCP-MRPS24 | FLJ20373   | PHF14    | RAD54L2  | SLC25A4   | TRIB2       | PLA2G2C        | URGCP-MRPS24 | RAD54L2  |
| C5orf51  | PPP2CB   | NOTCH2NL | FRAT2    | FAM83G         | ACSM3        | SDC1       | FAM13A   | TOR2A    | MYL12B    | TRIB1       | FAM83G         | ACSM3        | TOR2A    |
| PAPPA    | SLC30A7  | RANBP10  | ARRB1    | EFHD2          | SCNN1B       | KCNA6      | RP2      | PPP1R12B | C3orf52   | PPP3CA      | EFHD2          | SCNN1B       | PPP1R12B |
| HAND1    | SGMS2    | SLC2A1   | PRPF38A  | C14orf180      | HOXB3        | CADM2      | RTN4     | TNFSF4   | IGSF8     | ZBTB7A      | C14orf180      | HOXB3        | TNFSF4   |
| LPGAT1   | GDNF     | FAM214B  | CD207    | MRPL28         | HMGN1        | FLRT2      | ARHGAP24 | VPS4B    | BORA      | GRHL1       | MRPL28         | HMGN1        | VPS4B    |
| TGFBR1   | SUMO1    | RWDD2B   | FAM49B   | CROCC          | RB1CC1       | CAMK2B     | UBE2D3   | NEU1     | NDUFC1    | TMEM135     | CROCC          | RB1CC1       | NEU1     |
| CD34     | FOSL2    | FAXDC2   | MTHFR    | MBL2           | REG1B        | LIX1L      | PPP1R3B  | OSBPL9   | MYH1      | ST5         | MBL2           | REG1B        | OSBPL9   |
| ZBTB16   | SIMC1    | SRSF9    | UNK      | EPS8L3         | ELOVL6       | RORB       | LRRC57   | LFNG     | WBP2      | PPP1CB      | EPS8L3         | ELOVL6       | LFNG     |
| RNFT1    | SMARCD1  | ULK2     | WDR82    | FDX1L          | TMEM42       | RORA       | DUSP8    | SLC26A6  | CCL7      | NIPBL       | FDX1L          | TMEM42       | SLC26A6  |
| HOXB1    | GPM6A    | ITGA5    | SLC16A14 | ARHGAP19-SLIT1 | UBE2I        | CYTH1      | PDCD4    | NECAB3   | ASF1A     | MTMR3       | ARHGAP19-SLIT1 | UBE2I        | NECAB3   |
| SMIM3    | DOLPP1   | C16orf87 | LRRC73   | BSN            | PIRT         | SMTNL2     | SOX5     | EIF1AD   | USP53     | PI15        | BSN            | PIRT         | EIF1AD   |
| SALL4    | PTPRZ1   | EN2      | A4GNT    | TEAD3          | SYDE2        | KLF11      | KBTBD7   | TTPA     | CCSAP     | DESI2       | TEAD3          | SYDE2        | TTPA     |

## Aberrant circulating miRNAs in osteoporosis patients

|            |            |           |                   |                    |           |               |          |          |              |         |                    |           |          |
|------------|------------|-----------|-------------------|--------------------|-----------|---------------|----------|----------|--------------|---------|--------------------|-----------|----------|
| GATM       | TMEM167A   | PARP16    | ENO1              | ALOX15B            | OCIAD1    | GALNT1        | RMND5A   | FBXW4    | SATB1        | INSM1   | ALOX15B            | OCIAD1    | FBXW4    |
| LRIG3      | CMPK1      | MAN1C1    | CYR61             | CRYAB              | FGF7      | GOLGA3        | RAB22A   | C1orf210 | ARHGAP20     | CEP85   | CRYAB              | FGF7      | C1orf210 |
| CCL7       | ARPP21     | MMP16     | TRPM7             | CLUU10S            | LPGAT1    | ATCAY         | PDZD8    | DOCK3    | DHRS11       | MBNL1   | CLUU10S            | LPGAT1    | DOCK3    |
| SLC35D2    | PPP2R2D    | ADNP      | SLC35E4           | ST3GAL3            | WFDC12    | MAP3K7        | OLR1     | ENTPD1   | VRK3         | SMARCD1 | ST3GAL3            | WFDC12    | ENTPD1   |
| PPP1R15B   | LHX9       | TRAPPC6B  | C5orf24           | KLK4               | ZFP69B    | ZNF549        | SLC2A4RG | KIAA1841 | C6orf62      | NXF1    | KLK4               | ZFP69B    | KIAA1841 |
| DUSP16     | SLC6A1     | DDI2      | NUS1              | GIPC3              | HNRNPC    | UBE2I         | SPRY1    | ZNF460   | NAP1L5       | SLC44A1 | GIPC3              | HNRNPC    | ZNF460   |
| PBX3       | CNN2       | GBA       | RFXANK            | HPCA               | NRCAM     | TMEM183A      | RASGRP1  | C6orf47  | C12orf23     | ETV3    | HPCA               | NRCAM     | C6orf47  |
| TNFSF9     | KIRREL     | DERL2     | PLCXD3            | CAPNS1             | CDCP2     | ERI3          | PFKM     | TET2     | RP5-1052I5.2 | KDM6B   | CAPNS1             | CDCP2     | TET2     |
| GALNT1     | XXYLT1     | SHISA5    | ARPC5             | OBSCN              | DLL3      | ATXN2         | S100A10  | TRIAP1   | MCFD2        | RRAGD   | OBSCN              | DLL3      | TRIAP1   |
| ARID3A     | LANCL2     | HPCAL4    | CAV3              | VCX3A              | NXPE3     | XRN1          | RALGPS2  | PSMB8    | SYT4         | ZZEF1   | VCX3A              | NXPE3     | PSMB8    |
| ZC3HAV1L   | TPM4       | PODNL1    | TRIB2             | VCX3B              | CCDC36    | LRRC8B        | GLIS2    | DUS1L    | PKIA         | TRIM71  | VCX3B              | CCDC36    | DUS1L    |
| MARS2      | TMOD3      | PIM1      | ZNF740            | MAGEA11            | ESM1      | GABRB2        | KLF5     | CCNJ     | VEPH1        | CYP26B1 | MAGEA11            | ESM1      | CCNJ     |
| QARS       | VPS54      | HIST1H4D  | ATP8A1            | PDCD1              | IL1RAPL1  | PIK3CA        | BRWD1    | IRF4     | HMGB2        | CDYL2   | PDCD1              | IL1RAPL1  | IRF4     |
| LIPT2      | COL25A1    | SLC30A8   | EMILIN3           | PPP1R13B           | HMGB3     | CNNM4         | SPRY2    | BMF      | APAF1        | IGF1R   | PPP1R13B           | HMGB3     | BMF      |
| AP1S1      | AGRP       | USP37     | ODF1              | VCX                | CD226     | IL1RAPL1      | ELF2     | CDH5     | C2orf69      | TAOK1   | VCX                | CD226     | CDH5     |
| FOXP2      | SGPP1      | KAT6B     | SCYL3             | PHLDA3             | SSSCA1    | ZMYND11       | RECK     | PCTP     | STX12        | THAP2   | PHLDA3             | SSSCA1    | PCTP     |
| C8orf58    | FAM57A     | LNX2      | MPZL3             | AC092675.3         | RPAIN     | RAP2A         | PCBP1    | TMEM168  | SETD8        | SATB1   | AC092675.3         | RPAIN     | TMEM168  |
| TTC31      | FOXL2      | MXI1      | SIRT1             | GGA1               | FAM213A   | PTPN4         | SLC16A10 | PLEKHA8  | MEIS1        | AGO2    | GGA1               | FAM213A   | PLEKHA8  |
| ZBTB8B     | CAPN15     | HIST1H4L  | YWHAZ             | POP5               | GINS2     | IGDCC4        | ST3GAL6  | SLC39A9  | ZNF839       | BMPR2   | POP5               | GINS2     | SLC39A9  |
| TP53       | ZNF131     | USP8      | CBL               | CSNK2B-LY6G5B-1181 | KCNV2     | MDGA2         | KBTBD6   | OLFML2A  | B3GNT1       | ZNRF2   | CSNK2B-LY6G5B-1181 | KCNV2     | OLFML2A  |
| ZNF512B    | UBA2       | TP73      | KCNK12            | SLC25A48           | CLEC3A    | HAS3          | PPP1R3A  | HDDC3    | CCNG1        | ICMT    | SLC25A48           | CLEC3A    | HDDC3    |
| PBX1       | KIF3C      | GBX2      | FTL               | TMEM86B            | ARHGAP15  | ALPL          | SKI      | TSEN54   | MYCT1        | RMND5A  | TMEM86B            | ARHGAP15  | TSEN54   |
| GNG5       | EMP2       | MAP3K9    | FAM83F            | MED22              | SPC24     | NPAS3         | DMRTC1B  | TIFAB    | ZNF23        | FZD5    | MED22              | SPC24     | TIFAB    |
| CCNJ       | EIF4A1     | CA3       | XXbac-BP-G32J3.20 | NRM                | GZMK      | CECR6         | STAG2    | MAP2K7   | RRAS2        |         | NRM                | GZMK      | MAP2K7   |
| GXYLT1     | AFTPH      | FOXO4     | PPM1K             | PRCD               | ESCO2     | SSX2IP        | PITX2    | ABTB1    | ZIC4         |         | PRCD               | ESCO2     | ABTB1    |
| COIL       | NRIP3      | LGR4      | GHRHR             | NUDT2              | C12orf79  | ZNF367        | CD69     | MAP3K10  | ISCA2        |         | NUDT2              | C12orf79  | MAP3K10  |
| MYCN       | AL117190.3 | C19orf43  | SNAI1             | KCNK9              | CXCL11    | SNX18         | TADA2A   | APOC4    | SIX1         |         | KCNK9              | CXCL11    | APOC4    |
| GEMIN7     | GABARAPL1  | POLR3H    | CCNJL             | COL11A2            | CYLC2     | ONECUT1       | TRAPPC8  | SAMD14   | ATP11C       |         | COL11A2            | CYLC2     | SAMD14   |
| DDX19B     | B3GALNT1   | SNRK      | IL13RA1           | MAEL               | C1orf180  | CTD-2267D19.3 | CPEB3    | FAM213A  | CA2          |         | MAEL               | C1orf180  | FAM213A  |
| RAB15      | GARNL3     | HIC1      | PTEN              | LY9                | MAP1LC3B  | EPHA8         | PCSK6    | KHNYN    | HEXIM1       |         | LY9                | MAP1LC3B  | KHNYN    |
| XRN1       | RAP2C      | ZNF697    | COPS7B            | HOXB4              | ELL2      | PRKAA2        | SESN1    | IL6R     | CCM2         |         | HOXB4              | ELL2      | IL6R     |
| ADRB2      | TRIM44     | ESCO1     | DPM2              | SMIM6              | AAK1      | ELOVL6        | PCBP2    | NIPAL4   | HNF4G        |         | SMIM6              | AAK1      | NIPAL4   |
| DPH3       | GABPB2     | TTC26     | TMEM229B          | C2CD4C             | TERF2IP   | E2F7          | HRK      | BAP1     | CTCF         |         | C2CD4C             | TERF2IP   | BAP1     |
| SPRYD4     | ELFN1      | C10orf113 | AC007375.1        | SNX22              | BCL2L2    | H3F3C         | BCL7A    | ABHD6    | NCOA2        |         | SNX22              | BCL2L2    | ABHD6    |
| AC010441.1 | TXLNA      | ZNF436    | APBB2             | SYT12              | NUDT4     | H3F3B         | GLCCI1   | TNFAIP3  | SMIM18       |         | SYT12              | NUDT4     | TNFAIP3  |
| KCTD21     | STOM       | STT3A     | RIMS4             | MRPL38             | TMPPRS11E | ESRRG         | GABRB2   | SLITRK6  | ASAH2B       |         | MRPL38             | TMPPRS11E | SLITRK6  |
| STX3       | NAGS       | ZNF280B   | EPB41L2           | COMMD9             | LRRC28    | BAZ1B         | ARMC10   | HINFP    | NEK6         |         | COMMD9             | LRRC28    | HINFP    |
| ADAMTS8    | ANKRD28    | ARL6IP1   | FBXO46            | SCAMP5             | SMIM11    | FNBP1L        | LANCL1   | IER2     | RAB39B       |         | SCAMP5             | SMIM11    | IER2     |

## Aberrant circulating miRNAs in osteoporosis patients

|          |          |          |                     |          |          |             |               |           |          |          |          |           |
|----------|----------|----------|---------------------|----------|----------|-------------|---------------|-----------|----------|----------|----------|-----------|
| APBB3    | SLC6A6   | WASF2    | LGALS1              | FM04     | DCTPP1   | PAPD5       | PAN3          | MAVS      | MAP7     | FM04     | DCTPP1   | MAVS      |
| DDX19A   | CRTAM    | PTPN9    | IL17RD              | NT5C     | GRWD1    | TBX5        | ST6GAL1       | TSTA3     | RCHY1    | NT5C     | GRWD1    | TSTA3     |
| MED8     | ZC3H11A  | NKPD1    | KLF6                | AFAP1L2  | TMEM170B | CSRNP3      | ASF1A         | SEMA4D    | SPTSSB   | AFAP1L2  | TMEM170B | SEMA4D    |
| CDC25A   | PLEKHA3  | DNAH100S | ANKRD13A            | GLOD5    | GALNT11  | BBX         | RBPJ          | KCTD15    | SH3BGR   | GLOD5    | GALNT11  | KCTD15    |
| CCND2    | SFXN2    | SOGA1    | GATM                | DPYSL4   | LILRA1   | FAM196A     | PBRM1         | MTF1      | RGS8     | DPYSL4   | LILRA1   | MTF1      |
| E2F6     | DCLRE1A  | PEF1     | CENPV               | ELAVL3   | TMEM116  | PRRT3       | JHDM1D        | SH3TC2    | TPST1    | ELAVL3   | TMEM116  | SH3TC2    |
| CRCT1    | PFAS     | RSBN1L   | DAW1                | TCEAL6   | KLRB1    | IGSF1       | JAG1          | GJC1      | NACC2    | TCEAL6   | KLRB1    | GJC1      |
| FAS      | KIAA1429 | MPV17    | AK2                 | NHLRC4   | STARD4   | ACTG1       | MAP2K3        | KCNK10    | STXBP6   | NHLRC4   | STARD4   | KCNK10    |
| KLHDC8B  | QKI      | MBNL3    | NHP2                | LEMD2    | PATE1    | EPHA2       | GRAMD3        | GMIP      | YOD1     | LEMD2    | PATE1    | GMIP      |
| PSORS1C2 | MAEA     | LHFPL2   | DNAJB5              | TCEAL3   | FUT1     | KIAA0247    | CHIC1         | PODXL     | CCDC82   | TCEAL3   | FUT1     | PODXL     |
| UFM1     | TBPL1    | SLC27A4  | TYRO3               | CAND2    | MBLAC2   | MDGA2       | TME-<br>M170A | NR6A1     | FUT4     | CAND2    | MBLAC2   | NR6A1     |
| ZNF710   | SF3B4    | NRIP1    | ANKHD1-<br>EIF4EBP3 | KIAA1279 | EGLN3    | HNRNPK      | DCAF7         | SLC25A15  | FBN2     | KIAA1279 | EGLN3    | SLC25A15  |
| ATPAF1   | TMEM170B | KIF2A    | CDX2                | KLK14    | C10orf11 | JARID2      | HIPK3         | LRRC10B   | GLB1L3   | KLK14    | C10orf11 | LRRC10B   |
| GNPTAB   | SOX4     | ITGA9    | LRCH1               | FAM131B  | CALM1    | KCTD16      | TIAM1         | LIN28B    | CFL2     | FAM131B  | CALM1    | LIN28B    |
| CPEB2    | TSPAN18  | ZC3H12B  | CSF1R               | UBE2F    | ZNF80    | KLF7        | OSR1          | UBE2G1    | KIAA0922 | UBE2F    | ZNF80    | UBE2G1    |
| CPA4     | GCH1     | HIF1AN   | FBXL19              | MAP3K6   | RNF41    | PALM2       | MAP3K1        | SBNO1     | CLDN14   | MAP3K6   | RNF41    | SBNO1     |
| BEND4    | RBMXL1   | METTL21B | ERBB3               | YKT6     | CCDC91   | WWC2        | C10orf12      | PSTPIP2   | SYS1     | YKT6     | CCDC91   | PSTPIP2   |
| PEX11B   | DCBLD1   | ACSS2    | BTG1                | CLN6     | TIMELESS | NR4A3       | CASKIN1       | RS1       | TOX3     | CLN6     | TIMELESS | RS1       |
| PARD6B   | SH3GL2   | YWHAZ    | VASP                | RAB15    | MOB1B    | NEDD4       | MBLAC2        | CGREF1    | KIAA1107 | RAB15    | MOB1B    | CGREF1    |
| PQLC2    | ZNF280C  | PTPRU    | TRUB1               | LTA      | LRRRC63  | BCL6        | DAZL          | ATP10D    | A1BG     | LTA      | LRRRC63  | ATP10D    |
| SLC25A18 | SLC39A1  | H2AFX    | CATSPERG            | KRT35    | THTPA    | DOCK11      | NFIB          | MAPK12    | UQCRFS1  | KRT35    | THTPA    | MAPK12    |
| TMEM234  | METTL21B | HAP1     | LZIC                | ESYT1    | MORC1    | RNF165      | XKR6          | C17orf103 | NR6A1    | ESYT1    | MORC1    | C17orf103 |
| NEK3     | FOXC1    | MICALL1  | RBM15               | MSI1     | SMEK2    | RP6-24A23.6 | ERG           | SAMD10    | FRA10AC1 | MSI1     | SMEK2    | SAMD10    |
| TTLL4    | PTPRK    | C6orf223 | NCOA1               | MTSS1L   | TEKT1    | CTNNBIP1    | ALX1          | KCNS3     | ACVR1C   | MTSS1L   | TEKT1    | KCNS3     |
| KCTD17   | WASF2    | SHKBP1   | DPY30               | PAX5     | LYRM7    | WBP11       | PLAG1         | ARID3A    | TMED5    | PAX5     | LYRM7    | ARID3A    |
| SLC5A9   | RAVER1   | FAM199X  | NTRK2               | ANKRD24  | KCNJ14   | TRIM2       | CNTFR         | SYT2      | PDCL3    | ANKRD24  | KCNJ14   | SYT2      |
